# Supplementary material for: Could Pontimonas Harbour Halophilic Members Able to Withstand Very Broad Salinity Variations?
Source: Microorganisms. 2022 Apr 8;10(4):790. doi: 10.3390/microorganisms10040790 (PMC9030170; doi:10.3390/microorganisms10040790)
Supplement: Supplementary file 1 [file microorganisms-10-00790-s001.zip › microorganisms-1631548 - Table S1.xlsx]

## Sheet: Table S1
Table S1. Environmental parameters recorded for the ST samples from May 2012 to April 2014
Sample	Salinity	Water Temperature	pH	Conductivity	BOD5	Rains
	(‰)	(°C)		(ms/cm)	(mg/l)	(mm)
May12-S	38	20.7	8.16	56.1	2.7	8.8
Jun12-S	38	25.8	8.28	57.77	3.8	0
Jul12-S	38	23.3	8.12	56.6	3.2	7.9
Aug12-S	38	27.3	8.1	57.77	2.1	0
Sep12-S	38	22.3	8.15	57.77	0.5	0.2
Oct12-S	38	20.9	7.9	57.77	0.5	0
Nov12-S	40	16	8.1	59.75	3.2	1.2
Dec12-S	38	17	8.15	57.77	1.6	3.4
Jan13-S	38	10.1	8.2	57.77	10.4	57.5
Feb13-S	38	11.8	8.15	57.77	0.5	67.8
Mar13-S	38	14.2	8.1	57.77	1	30.7
Apr13-S	38	15	8.22	57.77	7.1	0
May13-S	38	18.1	8.2	57.77	0.5	15.4
Jun13-S	38	27.3	8.1	57.77	0.5	0
Jul13-S	38	29	8.2	57.77	1.6	1.8
Aug13-S	38	27.4	8.16	57.77	6	0
Sep13-S	38	21.7	8.2	57.77	1	0
Oct13-S	38	23.5	8.2	57.77	2.1	19.6
Nov13-S	40	18.5	8.2	59.75	1.6	33
Dec13-S	40	16.9	8.3	59.75	1.6	0.8
Jan14-S	38	11.5	8.1	57.77	1.6	44.3
Feb14-S	38	11.6	8.1	57.77	1	5.7
Mar14-S	40	15.3	8	59.75	1	0
Apr14-S	38	17.2	8.1	57.77	4.3	12.2
May12-P5	42	18.6	8.16	59.3	4.3	8.8
Jun12-P5	42	27.2	8.31	61.73	2.7	0
Jul12-P5	42	24.1	8.65	58.9	2.7	7.9
Aug12-P5	46	25.5	8.5	65.69	2.7	0
Sep12-P5	40	22.5	8.37	59.75	1	0.2
Oct12-P5	40	20.6	8.3	59.75	0.5	0
Nov12-P5	42	13.3	8.3	61.73	3.2	1.2
Dec12-P5	30	17.1	8.17	49.85	1.6	3.4
Jan13-P5	30	9.3	8.1	49.85	1	57.5
Feb13-P5	24	9.4	8.26	43.91	1	67.8
Mar13-P5	20	14.5	8.5	39.95	3.8	30.7
Apr13-P5	24	14.7	8.05	43.91	2.7	0
May13-P5	26	20.5	8.5	45.89	3.2	15.4
Jun13-P5	38	27.5	8.1	57.77	2.1	0
Jul13-P5	42	28.1	8.2	61.73	43.2	1.8
Aug13-P5	44	27.9	8.81	63.71	2.7	0
Sep13-P5	48	23.9	8.8	67.67	3.8	0
Oct13-P5	42	24	8.5	61.73	3.2	19.6
Nov13-P5	44	18.2	8.2	63.71	1	33
Dec13-P5	42	13.9	7.9	61.73	2.7	0.8
Jan14-P5	42	7.5	7.9	61.73	3.2	44.3
Feb14-P5	40	10.3	8.1	59.75	2	5.7
Mar14-P5	32	17	8.2	51.83	2.1	0
Apr14-P5	34	18.6	8.5	53.81	6.5	12.2
May12-P24	102	18.5	7.84	129.9	3.2	8.8
Jun12-P24	122	32.6	7.5	140.93	7.6	0
Jul12-P24	140	27.7	8.05	123.2	5.4	7.9
Aug12-P24	142	25.5	8.15	121.13	5.4	0
Sep12-P24	135	23	7.86	158.75	7.6	0.2
Oct12-P24	120	24.1	7.9	162.71	2.7	0
Nov12-P24	80	15.7	8.15	99.35	6.5	1.2
Dec12-P24	72	17.5	8.08	91.43	5.4	3.4
Jan13-P24	58	10.5	8.1	77.57	2.7	57.5
Feb13-P24	48	12.2	8	67.67	1.6	67.8
Mar13-P24	38	17.7	8.3	57.77	3.2	30.7
Apr13-P24	42	16.5	8.36	61.73	6.5	0
May13-P24	50	22.2	7.5	69.65	12	15.4
Jun13-P24	70	28.4	7.5	89.45	7.6	0
Jul13-P24	78	33.2	7.7	97.37	13.7	1.8
Aug13-P24	78	31.1	7.99	97.37	25.7	0
Sep13-P24	106	24.8	7.9	125.09	3.8	0
Oct13-P24	92	24.3	8	111.23	7.1	19.6
Nov13-P24	86	17.2	8	105.29	4.9	33
Dec13-P24	84	17	8	103.31	4.2	0.8
Jan14-P24	78	6.8	8	97.37	3.8	44.3
Feb14-P24	54	12.6	8.2	73.61	7.1	5.7
Mar14-P24	54	16.3	8.3	73.61	3	0
Apr14-P24	58	19.6	7.9	77.57	3	12.2
May12-P37	180	22	7.69	193.6	4.3	8.8
Jun12-P37	304	36.1	7.2	299	6.5	0
Jul12-P37	310	31.3	7.89	200	6.5	7.9
Aug12-P37	316	29.3	7.6	332.99	3.8	0
Sep12-P37	272	27.8	7.72	289.43	3.8	0.2
Oct12-P37	180	25.8	7.9	198.35	2.7	0
Nov12-P37	84	17.7	8.44	103.31	4.9	1.2
Dec12-P37	58	17.8	8.2	77.57	3.8	3.4
Jan13-P37	42	9.7	8.2	61.73	2.7	57.5
Feb13-P37	35	11.5	8.14	54.8	2.7	67.8
Mar13-P37	38	17.6	8.5	57.77	2.7	30.7
Apr13-P37	44	17.3	8.17	63.71	2.2	0
May13-P37	76	22.6	7.4	95.39	18.6	15.4
Jun13-P37	146	30.1	7.5	164.69	6.5	0
Jul13-P37	248	37.3	7.4	265.67	2.7	1.8
Aug13-P37	300	34.7	7.9	188.45	26.3	0
Sep13-P37	336	25.4	7.2	352.79	2.1	0
Oct13-P37	168	25.9	8.1	186.47	6	19.6
Nov13-P37	110	17.6	8	129.05	5.4	33
Dec13-P37	100	15.1	8.1	119.15	2.1	0.8
Jan14-P37	68	8.7	8.2	87.47	4.9	44.3
Feb14-P37	40	12.6	8.2	59.75	4.9	5.7
Mar14-P37	46	18.6	8.4	65.69	4	0
Apr14-P37	66	21.5	7.9	85.49	3	12.2
May12-BSB	230	22	7.63	236	8.7	8.8
Jun12-BSB	340	31.7	7.22	305	4.9	0
Jul12-BSB	360	32.7	8	178	2.7	7.9
Aug12-BSB	360	32	7.8	416.15	0.5	0
Sep12-BSB	296	27.4	7.77	313.19	8.7	0.2
Oct12-BSB	276	24.4	7.7	293.39	0.5	0
Nov12-BSB	186	20	7.85	176.57	1	1.2
Dec12-BSB	158	17.1	7.81	204.29	1.6	3.4
Jan13-BSB	150	12.8	7.8	168.65	1	57.5
Feb13-BSB	140	11.8	7.84	158.75	0.5	67.8
Mar13-BSB	120	19.4	7.7	138.95	0.5	30.7
Apr13-BSB	148	17.8	7.8	166.67	2.7	0
May13-BSB	184	22.3	7.6	202.31	1	15.4
Jun13-BSB	208	29.3	7.7	226.07	2.1	0
Jul13-BSB	272	35.9	7.5	289.43	3.8	1.8
Aug13-BSB	320	31.9	7.44	301.31	0.5	0
Sep13-BSB	360	25.4	7.3	382.49	1.6	0
Oct13-BSB	274	24.9	7.6	255.77	2.1	19.6
Nov13-BSB	240	19.7	7.6	257.75	1	33
Dec13-BSB	225	16.5	7.5	291.41	4.9	0.8
Jan14-BSB	132	10.2	7.7	150.83	1	44.3
Feb14-BSB	104	14.4	7.6	123.11	1	5.7
Mar14-BSB	114	16.4	7.7	133.01	1	0
Apr14-BSB	154	20.8	7.6	172.61	1	12.2
