# Supplementary figures and images for: Could Pontimonas Harbour Halophilic Members Able to Withstand Very Broad Salinity Variations?
Source: MDPI journal article supplement (doi:10.3390/microorganisms10040790), 2022-04-08

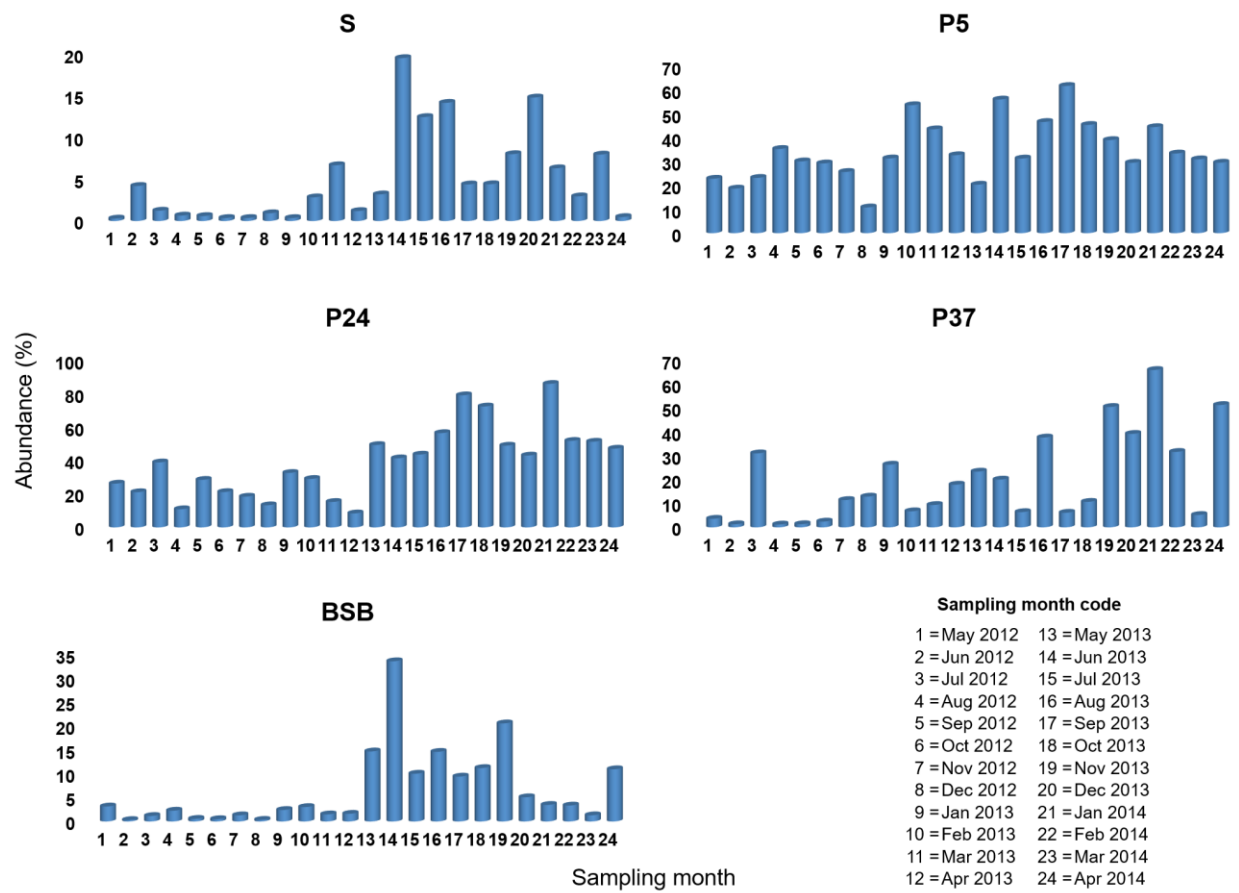

**Figure S1.** Occurrence of *Pontimonas* among the ST sampling sites in the period May 2012–April 2014.

Supplement: s1 [file s1]
